# Supplementary material for: StayGold variants for molecular fusion and membrane targeting applications
Source: Research Square preprint supplement (doi:10.21203/rs.3.rs-2941917/v1), 2023-05-19
Supplement: Supplementary file 1 [file f64700ef7c368c0d51391e4f.pdf]

# Supplementary Fig. 1

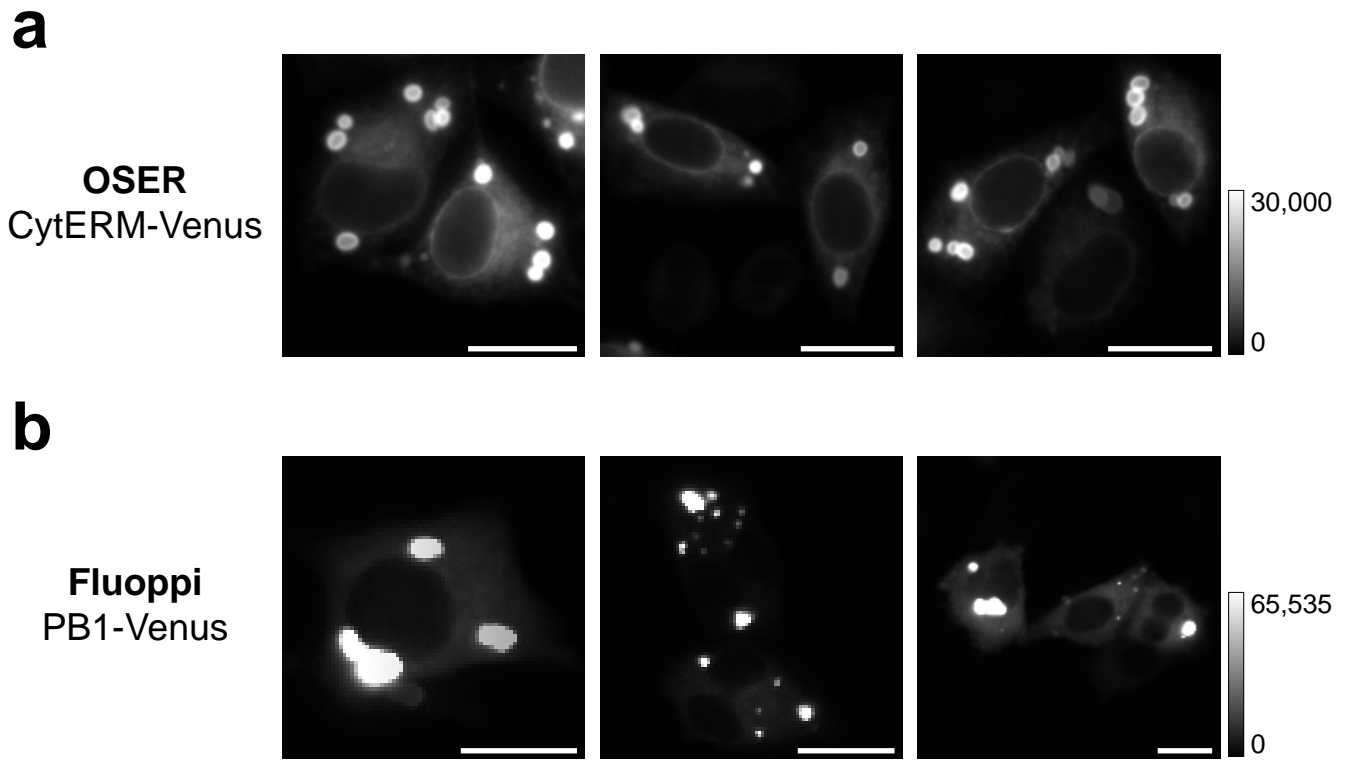

**Supplementary Fig. 1 | Comparison between OSER and Fluoppi for the assessment of Venus monomericity/dispersibility.**

**a**, OSER; three typical images of HeLa cells that showed whorls of CytERM-Venus signals.

**b**, Fluoppi; three typical images of HeLa cells that showed puncta of PB1-Venus signals. PB1-Venus appeared to yield more efficient signal concentration with less background than CytERM-Venus.

Therefore, overall, Fluoppi is expected to provide a higher signal-to-noise ratio than OSER. Each gray scale indicates that the lowest and highest fluorescence intensities. Scale bars, 20  $\mu\text{m}$ .

# Supplementary Fig. 2

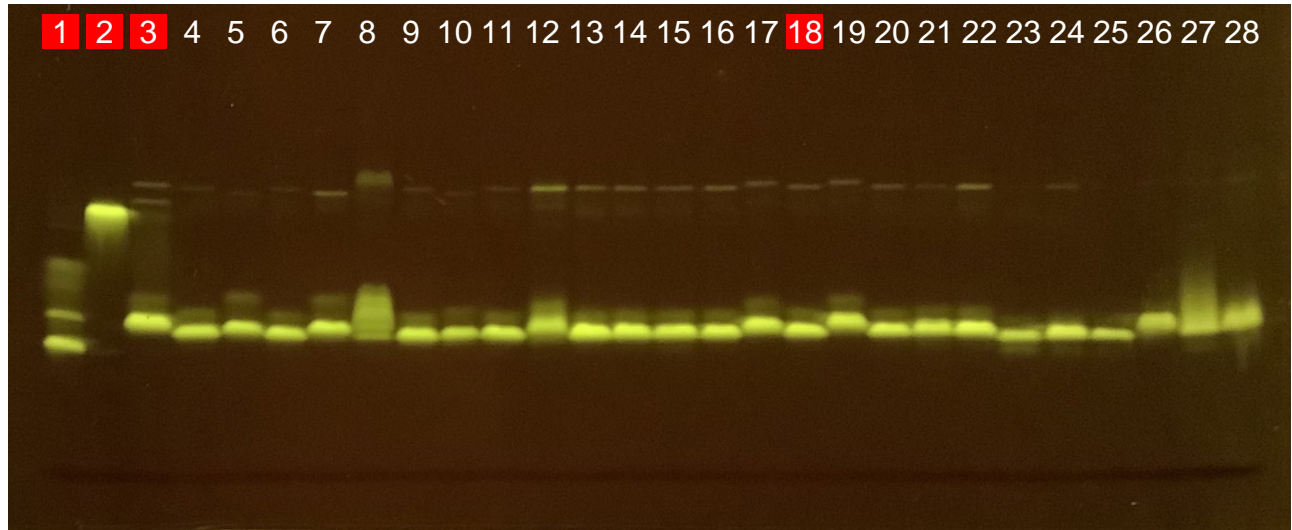

- 1) EGFP
- 2) StayGold
- 3) QC2-6
- 4) QC2-6 Y187F / R144I ran1
- 5) QC2-6 Y187F / R144I ran2
- 6) QC2-6 Y187F / R144I ran3
- 7) QC2-6 Y187F / R144I ran4
- 8) QC2-6 Y187F / R144I ran5
- 9) QC2-6 Y187F / R144I ran6
- 10) QC2-6 Y187F / R144I ran7
- 11) QC2-6 Y187F / R144I ran8
- 12) QC2-6 Y187F / R144I ran9
- 13) QC2-6 Y187F / R144I
- 14) QC2-6 Y187F / R144I / T155F
- 15) QC2-6 Y187F / R144I / T155H
- 16) QC2-6 Y187F / R144I / T155I
- 17) QC2-6 Y187F / R144I / T155K
- 18) QC2-6 Y187F / R144I / T155Q
- 19) QC2-6 Y187F / R144I / T155R
- 20) QC2-6 Y187F / R144I / T155V
- 21) QC2-6 Y187F / R144I / T155W
- 22) QC2-6 Y187F / R144I / T155Y
- 23) QC2-6 R144E
- 24) QC2-6 R144E / T155I
- 25) QC2-6 R144E / T155M
- 26) QC2-6 R144E / T155R
- 27) QC2-6 R144E / T155V
- 28) QC2-6 R144E / T155Y

## Supplementary Fig. 2 | Pseudonative SDS-PAGE of purified bacterially expressed proteins.

A panel showing the final stage of the revolution reaching QC2-6 FIQ (lane 18). QC2-6 (lane 3) and its derivatives were analyzed in reference to EGFP (lane 1) and StayGold (lane 2). QC2-6 FIQ (= QC2-6 Y187F/R144I/T155Q) exhibited a slightly greater mobility than QC2-6. Lanes 4–12: nine bright colonies were selected from a mutant library on the basis of products of error-prone PCR on QC2-6 Y187F/R144I. ran: random mutagenesis.

# Supplementary Fig. 3

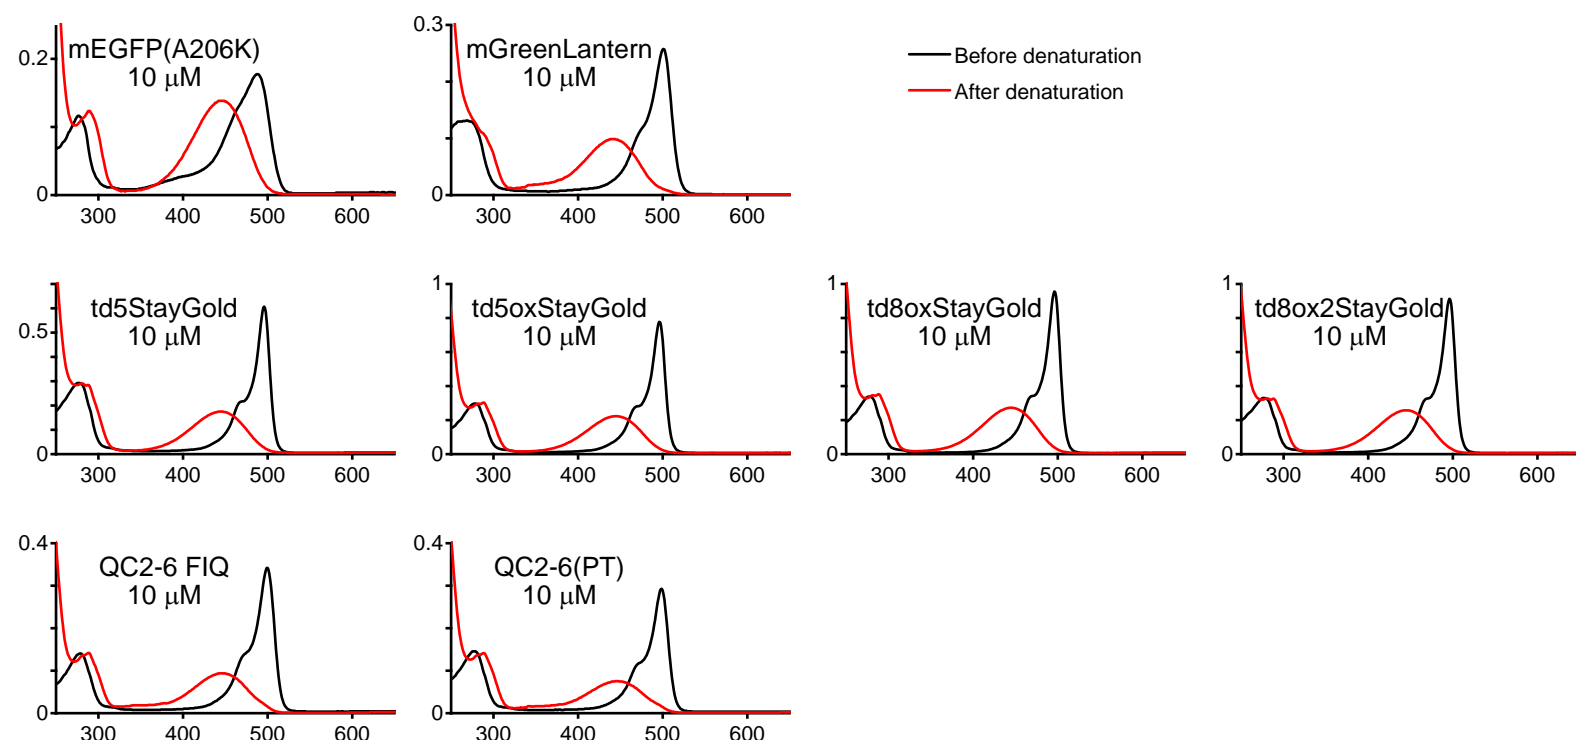

## Supplementary Fig. 3 | Spectral assessment of inherent qualities of FP chromophores.

Absorption spectra of FPs before (black line) and after (red line) denaturation with 0.1 M NaOH. The FP concentration was 10  $\mu\text{M}$ , and the path length was 1 cm. All these FPs carry X-Tyr-Gly, a chromophore-forming tripeptide, and their alkali-denatured chromophores contain a dehydrotyrosine residue conjugated to the imidazolone group and absorb light maximally at 447 nm with a molar extinction coefficient of  $44,000 \text{ M}^{-1} \text{ cm}^{-1}$ . This value was used for the determination of their absolute molar extinction coefficients.

# Supplementary Fig. 4

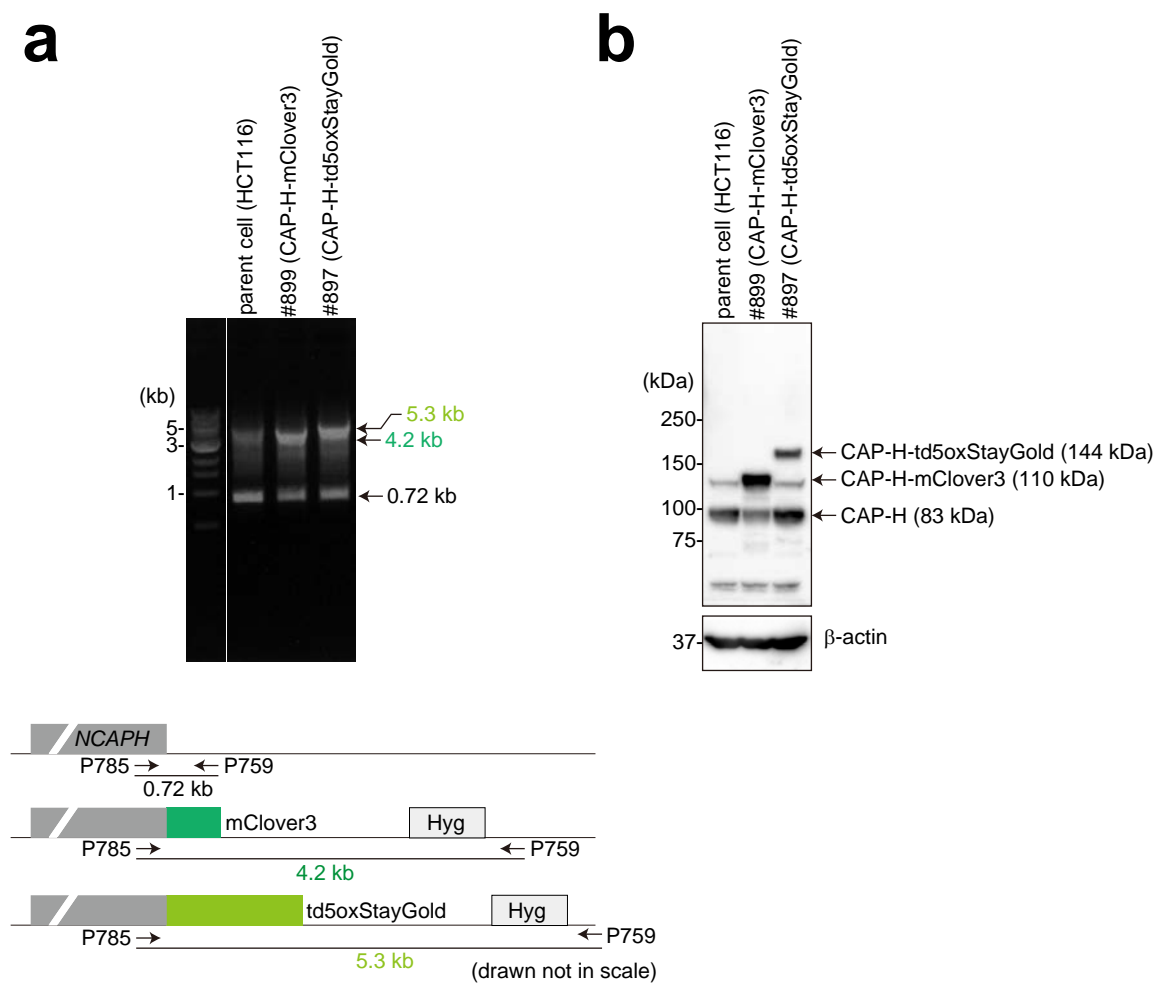

## Supplementary Fig. 4 | Validation of knock-in cell lines.

Cell lines #899 and #897 were characterized in parallel with their parent (HCT116) by junction PCR (**a**) and western blotting (**b**). HCT116 cell line is a chromosomally stable human colorectal cancer cell line and has two alleles of the CAP-H gene (*NCAPH*). The following results indicate that the CAP-H gene was heterozygously tagged in both cell lines.

**a**, Primers located outside of the left (P785) and right (P759) homology arms were used. A 0.72-kb fragment derived from untagged CAP-H was detected for both cell lines #899 and #897 in addition to the fragments from mClover3-CAP-H (4.2 kb) and td5oxStayGold-tagged CAP-H (5.3 kb), respectively.

Hyg: hygromycin resistance gene.

**b**, Anti-CAP-H antibody (Proteintech, #11515-1-AP) was used to characterize the size of CAP-H proteins. An 83-kDa band for untagged CAP-H was detected for both cell lines #899 and #897 in addition to those for mClover3-tagged (110 kDa) and td5oxStayGold-tagged (144 kDa) CAP-H proteins, respectively. Anti- $\beta$ -actin monoclonal antibody (AC-15) was used as a loading control.

# Supplementary Fig. 5

td5StayGold(c4)=GianCreg  
td8oxStayGold(c4)= $\beta$ -tubulin

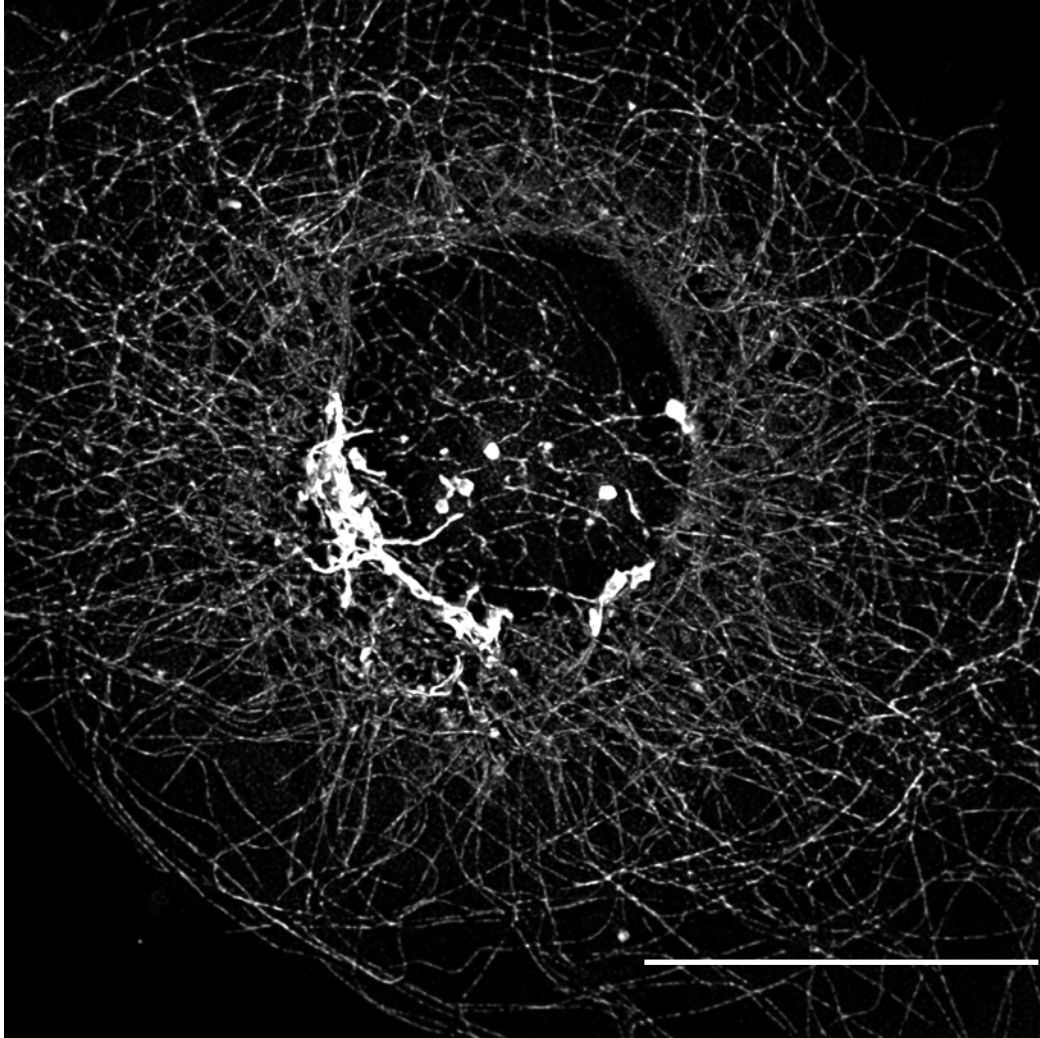

## **Supplementary Fig. 5 | Dual-targeting of StayGold variants to the Golgi apparatus and microtubule network.**

COS-7 cells were cotransfected with td5StayGold(c4)=GianCreg and td8ox2StayGold(c4)= $\beta$ -tubulin. A fine 3D reconstruction of the whole Golgi apparatus with a microtubule network was generated by volumetric imaging ( $z$ -step, 0.216  $\mu\text{m}$ ;  $z$ -range, 1.94  $\mu\text{m}$ ) using the lattice SIM method (Elyra 7). The Leap mode was used. Scale bar, 20  $\mu\text{m}$ . Shown is a representative of  $n = 7$  independent experiments (transfections).

# Supplementary Fig. 6

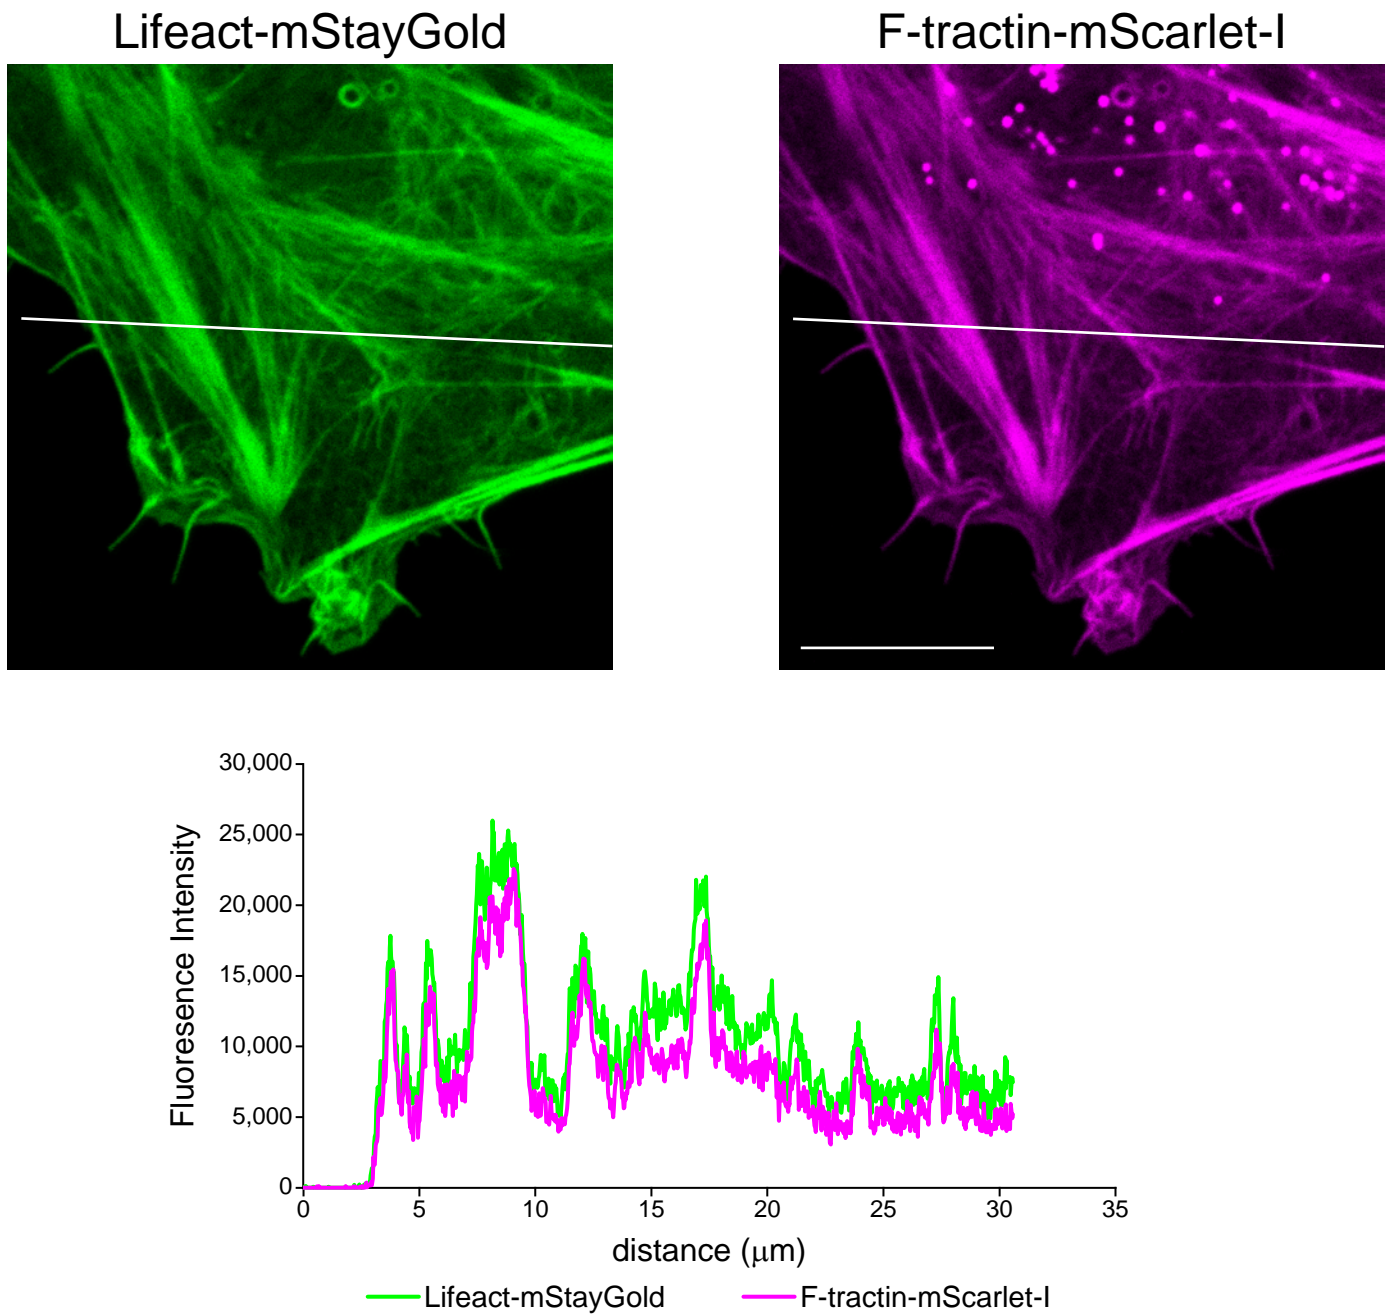

**Supplementary Fig. 6 | Colocalization of Lifect-mStayGold and F-tractin-mScarlet-I in a Vero cell.**  
*top*, CLSM (single-beam) images of Lifect-mStayGold (left, green channel) and F-tractin-mScarlet-I (right, red channel). Scale bar, 10 μm.  
*bottom*, The line profile plots indicate the intensity distribution of green and red channels through the white lines across the cell.



# Supplementary Fig. 7

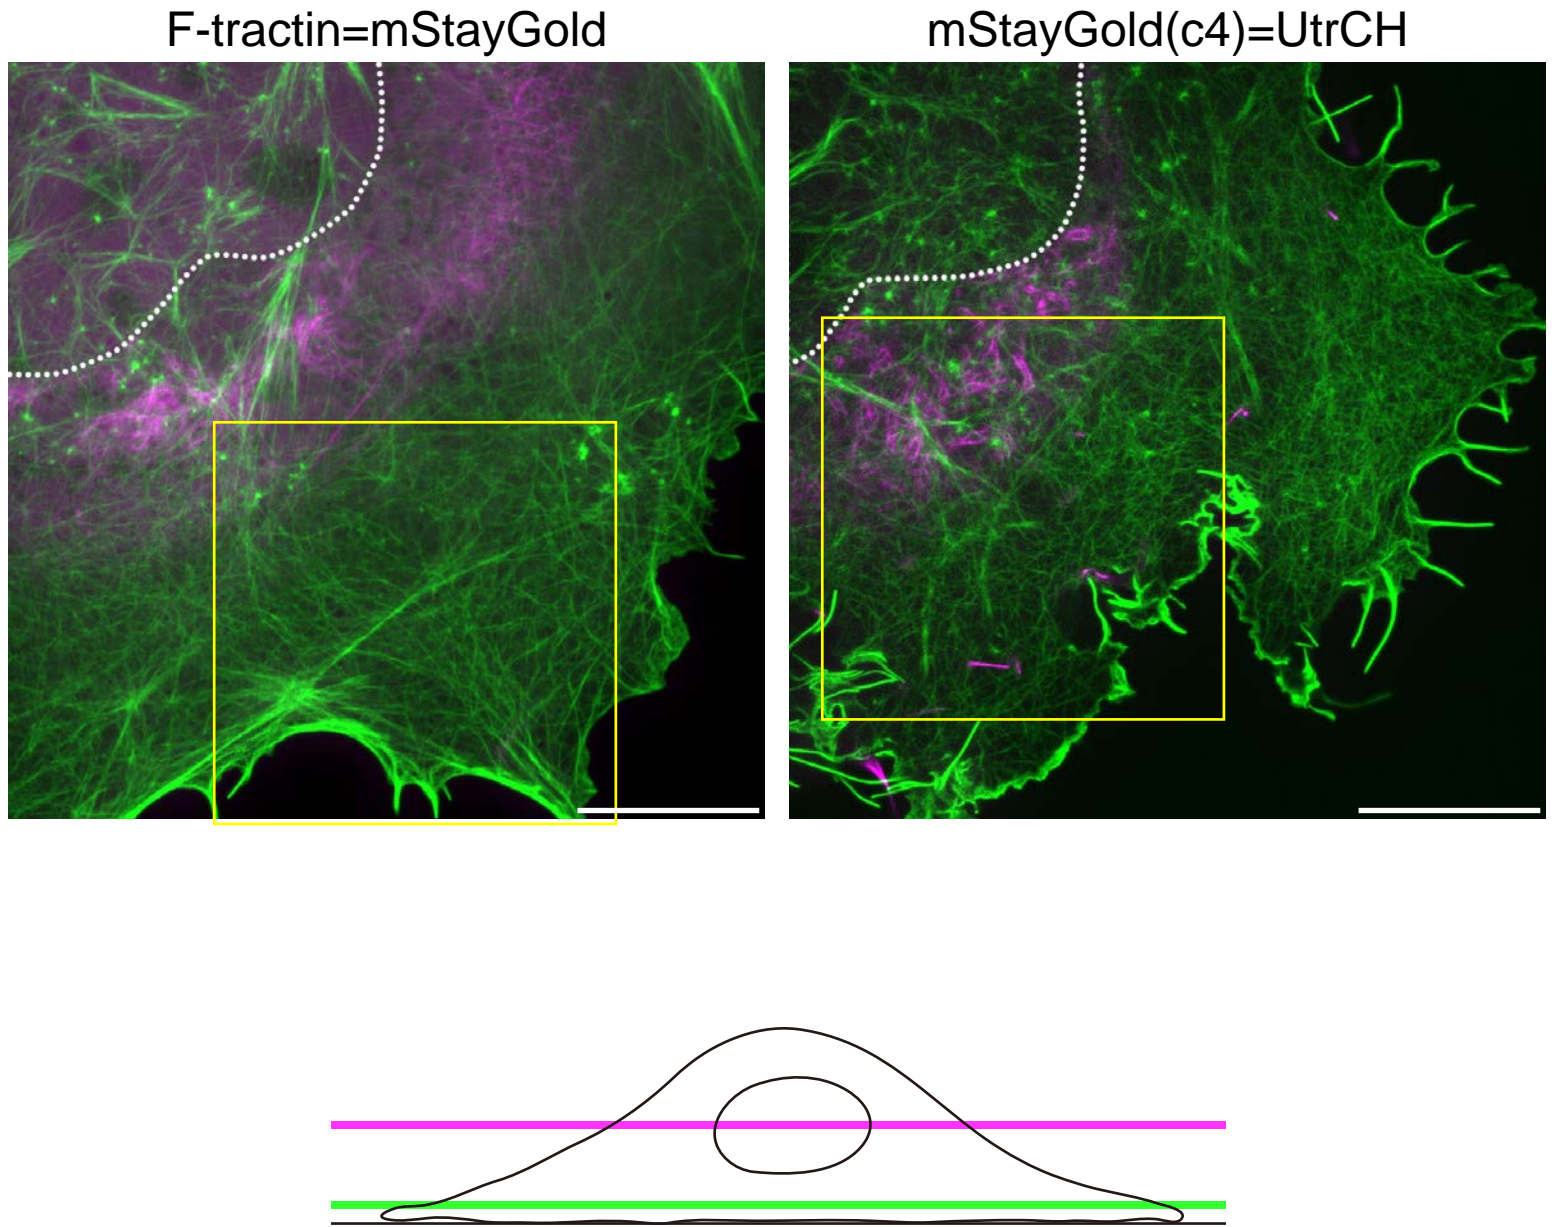

## Supplementary Fig. 7 | F-actin distribution visualized by mStayGold-tagged actin-binding domains.

COS-7 cells expressing F-tractin=mStayGold (left) or mStayGold(c4)=UtrCH (right) were imaged by SDSRM (SpinSR10). UtrCH: utrophin calponin homology domain<sup>28</sup>. For each experiment, a confocal image sectioned nearest the cell bottom is shown in green. Images were acquired continuously at 3.18 frames/s for 5.24 min (boxed regions, Supplementary Video 6). A confocal image sectioned across the center of the nucleus is shown in magenta. The nucleus is delineated by a dotted line. Scale bars, 10  $\mu\text{m}$ . The F-tractin=mStayGold images shown are representative of  $n = 15$  independent cell samples. The mStayGold(c4)=UtrCH images shown are representative of  $n = 13$  independent cell samples.

# Supplementary Fig. 8

COX8a=mStayGold

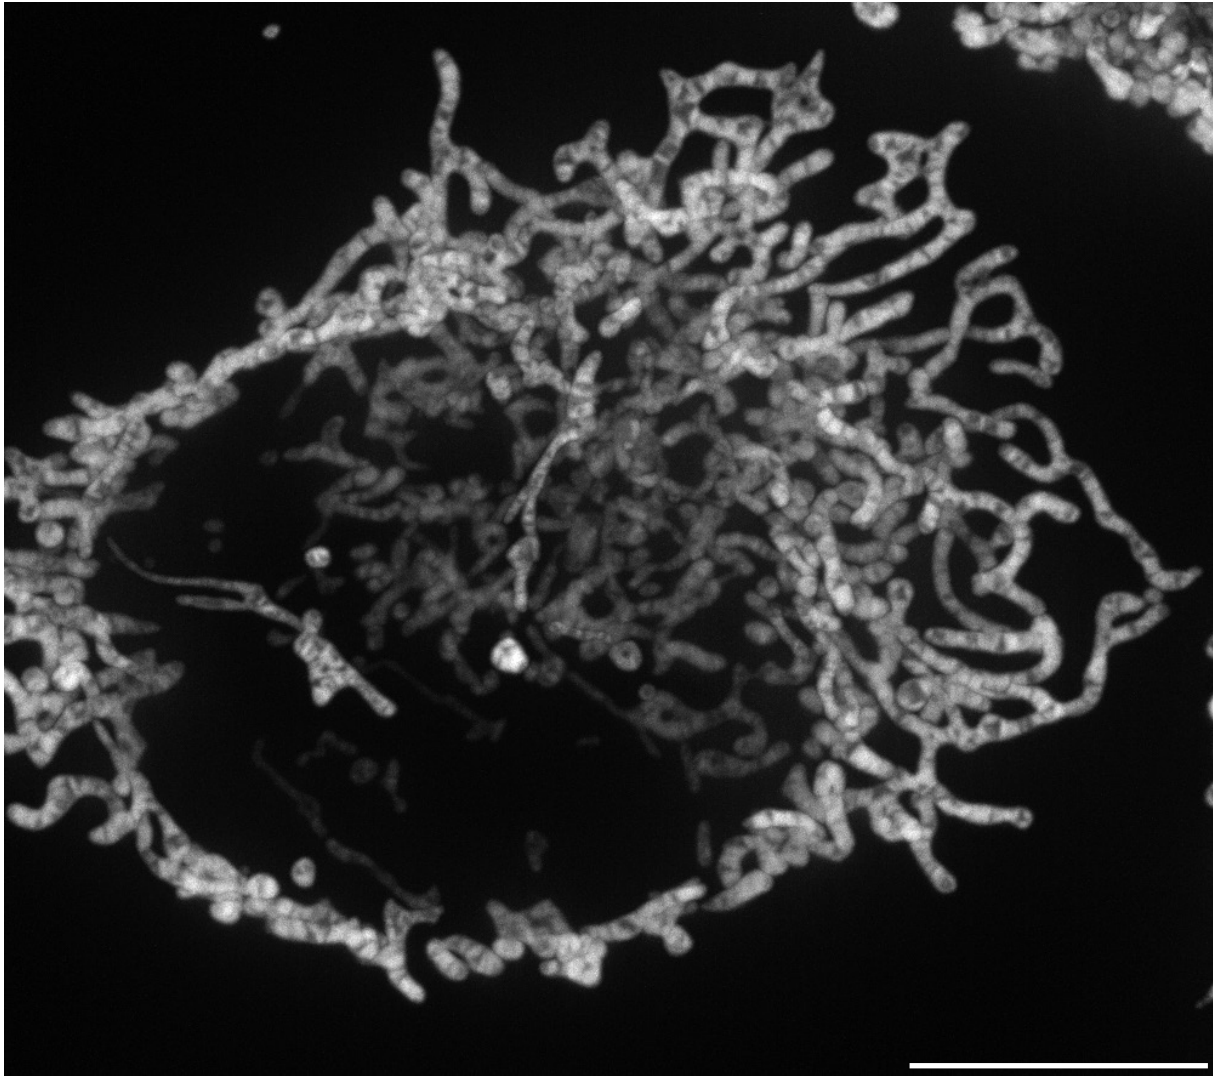

**Supplementary Fig. 8 | A cell-wide 3D reconstruction of the inner mitochondrial membrane.**

HeLa cells constitutively expressing COX8a=mStayGold were volume ( $z$  step,  $0.25\ \mu\text{m}$ ;  $z$  range,  $9.0\ \mu\text{m}$ ) imaged by SDSRM (SpinSR10) with an exposure time of 200 ms. An MIP image is shown.

Some mitochondria were found along the nuclear tubular invaginations. Scale bar,  $10\ \mu\text{m}$ . Shown is a representative of  $n = 4$  cell samples.



# Supplementary Table. 1

|                                    | StayGold pH8.5                      | StayGold pH5.6                      |
|------------------------------------|-------------------------------------|-------------------------------------|
| Wavelength (Å)                     | 1.0                                 | 1.0                                 |
| Resolution range (Å)               | 91.2 - 1.56 (1.62 - 1.56)           | 67.0 - 2.2 (2.28 - 2.2)             |
| Space group                        | P 2 <sub>1</sub>                    | P 6 <sub>1</sub>                    |
| Unit cell                          | 53.9 Å 44.9 Å 93.8 Å 90° 103.4° 90° | 134.0 Å 134.0 Å 59.0 Å 90° 90° 120° |
| Total reflections                  | 335808 (28363)                      | 325103 (19041)                      |
| Unique reflections                 | 61988 (5842)                        | 30868 (3015)                        |
| Multiplicity                       | 5.4 (4.9)                           | 10.5 (6.3)                          |
| Completeness (%)                   | 99.2 (93.0)                         | 99.8 (98.1)                         |
| Mean I/sigma(I)                    | 8.85 (0.46)                         | 10.97 (2.77)                        |
| Wilson B-factor                    | 17.48                               | 14.25                               |
| R-merge                            | 0.06797 (0.4089)                    | 0.1706 (0.4423)                     |
| R-meas                             | 0.07498 (0.4577)                    | 0.1794 (0.4842)                     |
| R-pim                              | 0.03111 (0.2015)                    | 0.05485 (0.1913)                    |
| CC1/2                              | 0.999 (0.91)                        | 0.994 (0.85)                        |
| CC*                                | 1.000 (0.976)                       | 0.998 (0.958)                       |
| Reflections used in refinement     | 61893 (5759)                        | 30858 (3015)                        |
| Reflections used for R-free        | 1986 (197)                          | 1994 (192)                          |
| R-work                             | 0.1863 (0.3585)                     | 0.1547 (0.2039)                     |
| R-free                             | 0.2153 (0.3804)                     | 0.1897 (0.2869)                     |
| CC(work)                           | 0.967 (0.869)                       | 0.968 (0.888)                       |
| CC(free)                           | 0.956 (0.824)                       | 0.951 (0.833)                       |
| Number of non-hydrogen atoms       | 4160                                | 4043                                |
| macromolecules                     | 3475                                | 3488                                |
| ligands                            | 40                                  | 63                                  |
| solvent                            | 663                                 | 492                                 |
| Protein residues                   | 424                                 | 425                                 |
| RMS(bonds)                         | 0.002                               | 0.002                               |
| RMS(angles)                        | 0.54                                | 0.62                                |
| Ramachandran favored (%)           | 98.55                               | 97.12                               |
| Ramachandran allowed (%)           | 1.45                                | 2.88                                |
| Ramachandran outliers (%)          | 0.00                                | 0.00                                |
| Rotamer outliers (%)               | 0.54                                | 1.05                                |
| Clashscore                         | 2.99                                | 2.77                                |
| Average B-factor (Å <sup>2</sup> ) | 22.63                               | 15.56                               |
| macromolecules (Å <sup>2</sup> )   | 19.57                               | 14.09                               |
| ligands (Å <sup>2</sup> )          | 13.83                               | 13.61                               |
| solvent (Å <sup>2</sup> )          | 32.87                               | 26.23                               |

Supplementary Table. 1 | Data collection and refinement statistics.  
Statistics for the highest-resolution shell are shown in parentheses.

## **Supplementary Video captions**

### **Supplementary Video 1 | Visualization of chromosome-targeting of td5oxStayGold-tagged condensin I at low copy number expressed via a genome-editing technique.**

After release from cell cycle arrest, genome-edited HCT116 cells (#897) were imaged for CAP-H-td5oxStayGold (at 488 nm excitation) and SiR-DNA-labeled chromosomes (at 637 nm excitation) using spinning-disk LSCM (SpinSR10) at the indicated times (hour: min). Every 1 min, 3D scanning was executed with a  $z$ -step size of 1  $\mu\text{m}$  over an axial range of 13  $\mu\text{m}$ , and the green and far-red fluorescence images were merged. Maximum intensity projection (MIP) images are shown. This movie (6.20 MB) has been generated via considerable compression of the original large-volume video data (1.52 GB). Compression was made using TMPGEnc. See Fig. 4. Shown is a representative of  $n = 3$  independent experiments.

**Supplementary Video 2 | High-speed visualization of chromosome-targeting of td5oxStayGold-tagged condensin I in genome-edited HCT116 cells.** After release from cell cycle arrest, genome-edited HCT116 cells (#897) were imaged at a single  $z$  position for observing CAP-H-td5oxStayGold (488 nm excitation) and for SiR-DNA-labeled chromosomes (637 nm excitation) by spinning-disk LSCM (SpinSR10) at 1 frame per second. Merged images at the indicated times (min: s). This movie (9.05 MB) has been generated via considerable compression of the original large-volume video data (7.03 GB). Compression was made using FFmpeg. See Extended Data Fig. 5a.

**Supplementary Video 3 | Photostability comparison between CAP-H-mClover3 and CAP-H-td5oxStayGold under the same optical conditions.** Genome-edited HCT116 cells (#899, left vs. #897, right) during prometaphase were volume ( $z$  step, 0.25  $\mu\text{m}$ ;  $z$  range, 2.5  $\mu\text{m}$ ) imaged by spinning-disk LSCM (SpinSR10) with excitation at 488 nm continuously every 6.9 sec over a total period of 278 sec. MIP images are shown. This movie (1.40 MB) has been generated via considerable compression of the original large-volume video data (12.4 MB). Compression was made using TMPGEnc. Elapsed times (min: s). See Extended Data Fig. 5b.

**Supplementary Video 4 | Visualization of td5StayGold-harboring Golgi membranes.** Volumetric and continuous imaging of HeLa cells expressing td5StayGold(c4)=GianCreg in two independent experiments (top and bottom). Cells were volume ( $z$  step, 0.5  $\mu\text{m}$ ;  $z$  range, 2.5  $\mu\text{m}$ ) imaged by SDSRM (SpinSR10)

continuously with an exposure time of 100 ms without using the z-drift compensator (IX3-ZDC2, Evident). MIP images are shown. This movie (9.88 MB) has been generated via considerable compression of the original large-volume video data (122 MB). Compression was made using TMPGEnc. Elapsed times (min: s). See Fig. 5b.

**Supplementary Video 5 | Visualization of the Golgi apparatus and microtubule network.**

A COS-7 cell expressing td5StayGold(c4)=GianCreg and td8ox2StayGold(c4)= $\beta$ -tubulin was volume (z step, 0.5  $\mu$ m; z range, 1.5  $\mu$ m) imaged by SDSRM (SpinSR10) continuously with an exposure time of 200 ms without using the z-drift compensator (IX3-ZDC2, Evident). MIP images are shown. This movie (9.43 MB) has been generated via considerable compression of the original large-volume video data (100 MB). Compression was made using TMPGEnc. Elapsed times (min: s).

**Supplementary Video 6 | Visualizing F-actin dynamics by continuous, sustainable, cell-wide imaging.**

COS-7 cells expressing F-tractin=mStayGold (left) or mStayGold(c4)=UtrCH by imaged by SDSRM (SpinSR10) at a single z position at 3.18 frames/s for 5.24 min. Elapsed times (min: s). This movie (9.05 MB) has been generated via considerable compression of the original large-volume video data (7.03 GB). Compression was made using TMPGEnc. See Supplementary Fig. 7.

**Supplementary Video 7 | Visualizing the effects of drugs on F-actin organization.**

COS7 cells expressing F-tractin=mStayGold (top) or mStayGld(c4)=UtrCH (bottom) were imaged by SDSRM (SpinSR10) at a single z position at 2.41 frames/s for 13.82 min. Cells were treated with 1  $\mu$ M Cytochalasin D (left) or 2  $\mu$ M Latrunculin A (right). Elapsed times (min: s). This movie (9.38 MB) has been generated via considerable compression of the original large-volume video data (4.29 GB). Compression was made using FFmpeg. See Extended Data Fig. 7.

**Supplementary Video 8 | Visualizing the inner mitochondrial membrane dynamics by sustainable, cell-wide volumetric SIM imaging.**

HeLa cells expressing COX8a=mStayGold were 3D scanned continuously with a z-step size of 0.11  $\mu$ m over an axial range of 2.08  $\mu$ m by lattice SIM (Elyra 7) at 37 °C. The total number of acquired volumes was 47. SIM<sup>2</sup> was used for image reconstruction. This movie (6.69 MB) has been generated via considerable compression of the original large-volume video data (47 MB). Compression was made using TMPGEnc. Elapsed times (min: s). See Fig. 5c.

**Supplementary Video 9 | Visualizing the inner mitochondrial membrane dynamics by fast, sustainable imaging.** HeLa cells expressing COX8a=mStayGold were imaged by SDSRM (SpinSR10). Single-plane images were acquired continuously at 8.70 frames/s (exposure time: 100 ms). This movie highlights stable mitochondria. The autofocus function of a *z*-drift compensator (IX3-ZDC2, Evident) was continuously active. The total number of acquired frames was 1,000. This movie (6.71 MB) has been generated via considerable compression of the original large-volume video data (70.7 MB). Compression was made using TMPGEnc. Elapsed times (min: s). The stable IMM dynamics shown is a representative of  $n = 17$  cells over  $n = 10$  independent transfections.

**Supplementary Video 10 | Visualizing the inner mitochondrial membrane dynamics by fast, sustainable imaging.** HeLa cells expressing COX8a=mStayGold were imaged by SDSRM (SpinSR10). Single-plane images were acquired continuously at 2.41 frames/s (exposure time: 400 ms). This movie highlights a mobile mitochondrion. The autofocus function of a *z*-drift compensator (IX3-ZDC2, Evident) was continuously active. The total number of acquired frames was 500. This movie (3.19 MB) has been generated via considerable compression of the original large-volume video data (31.4 MB). Compression was made using TMPGEnc. Elapsed times (min: s). The mobile IMM dynamics shown is a representative of  $n = 14$  cells over  $n = 9$  independent transfections.

**Supplementary Video 11 | Agonist-, antagonist-, and  $\text{Ca}^{2+}$  ionophore-induced longitudinal changes in IMM structures revealed by fast, sustained, wide imaging.** HeLa cells expressing COX8a=mStayGold were imaged by SDSRM (SpinSR10) continuously at a temporal resolution of 2.5 frames per second. Two representative experimental data are shown. Histamine, cyproheptadine, and ionomycin were applied at 1 minute, 2.5 minutes, and 4 minutes, respectively. The autofocus function of a *z*-drift compensator (IX3-ZDC2, Evident) was continuously active. This movie (8.9 MB) has been generated via considerable compression of the original large-volume video data (412 MB). Compression was made using TMPGEnc. Elapsed times (min: s). See Extended Data Fig. 8. Representatives of  $n = 12$  independent experiments (transfections).
